# Supplementary material for: Accurate and reproducible prediction of ICU readmissions
Source: bioRxiv or medRxiv preprint supplement (doi:10.1101/2019.12.26.19015909), 2021-02-13
Supplement: Supplementary file [file media-1.pdf]

# Appendix 1: Supplementary figures

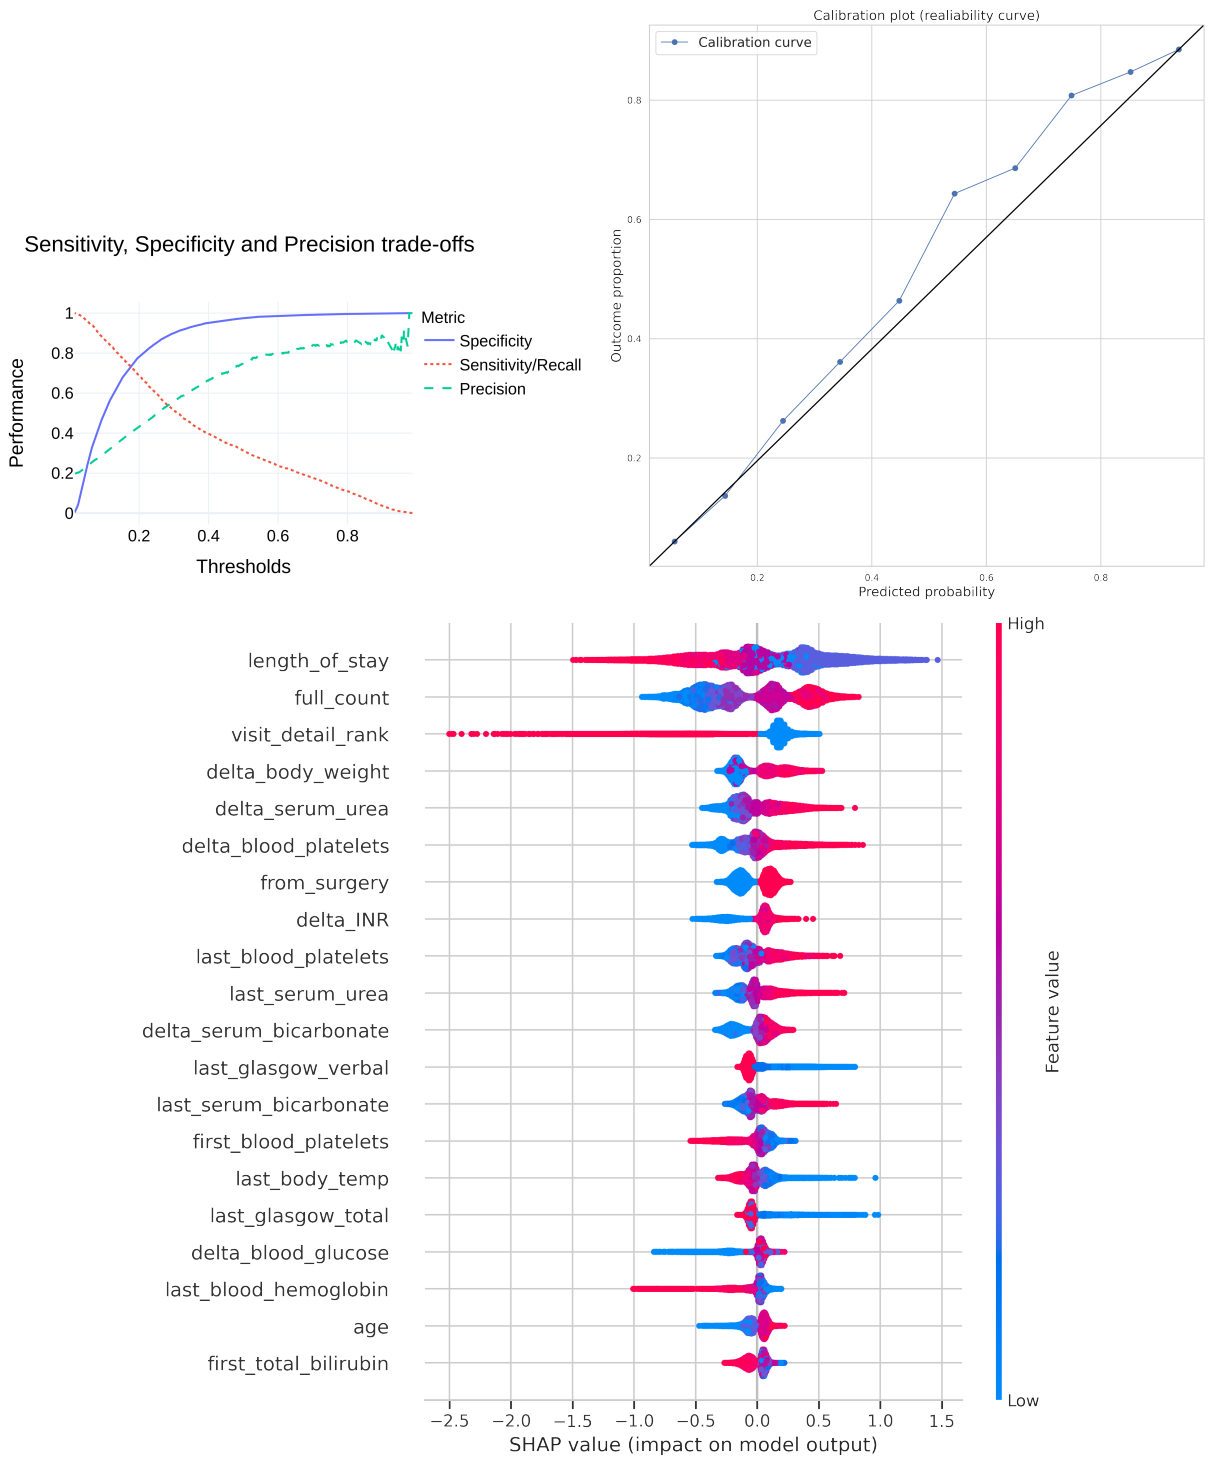

**Fig. 4.** Performance trade-offs, calibration plot and features importance plot for 7-days readmission prediction

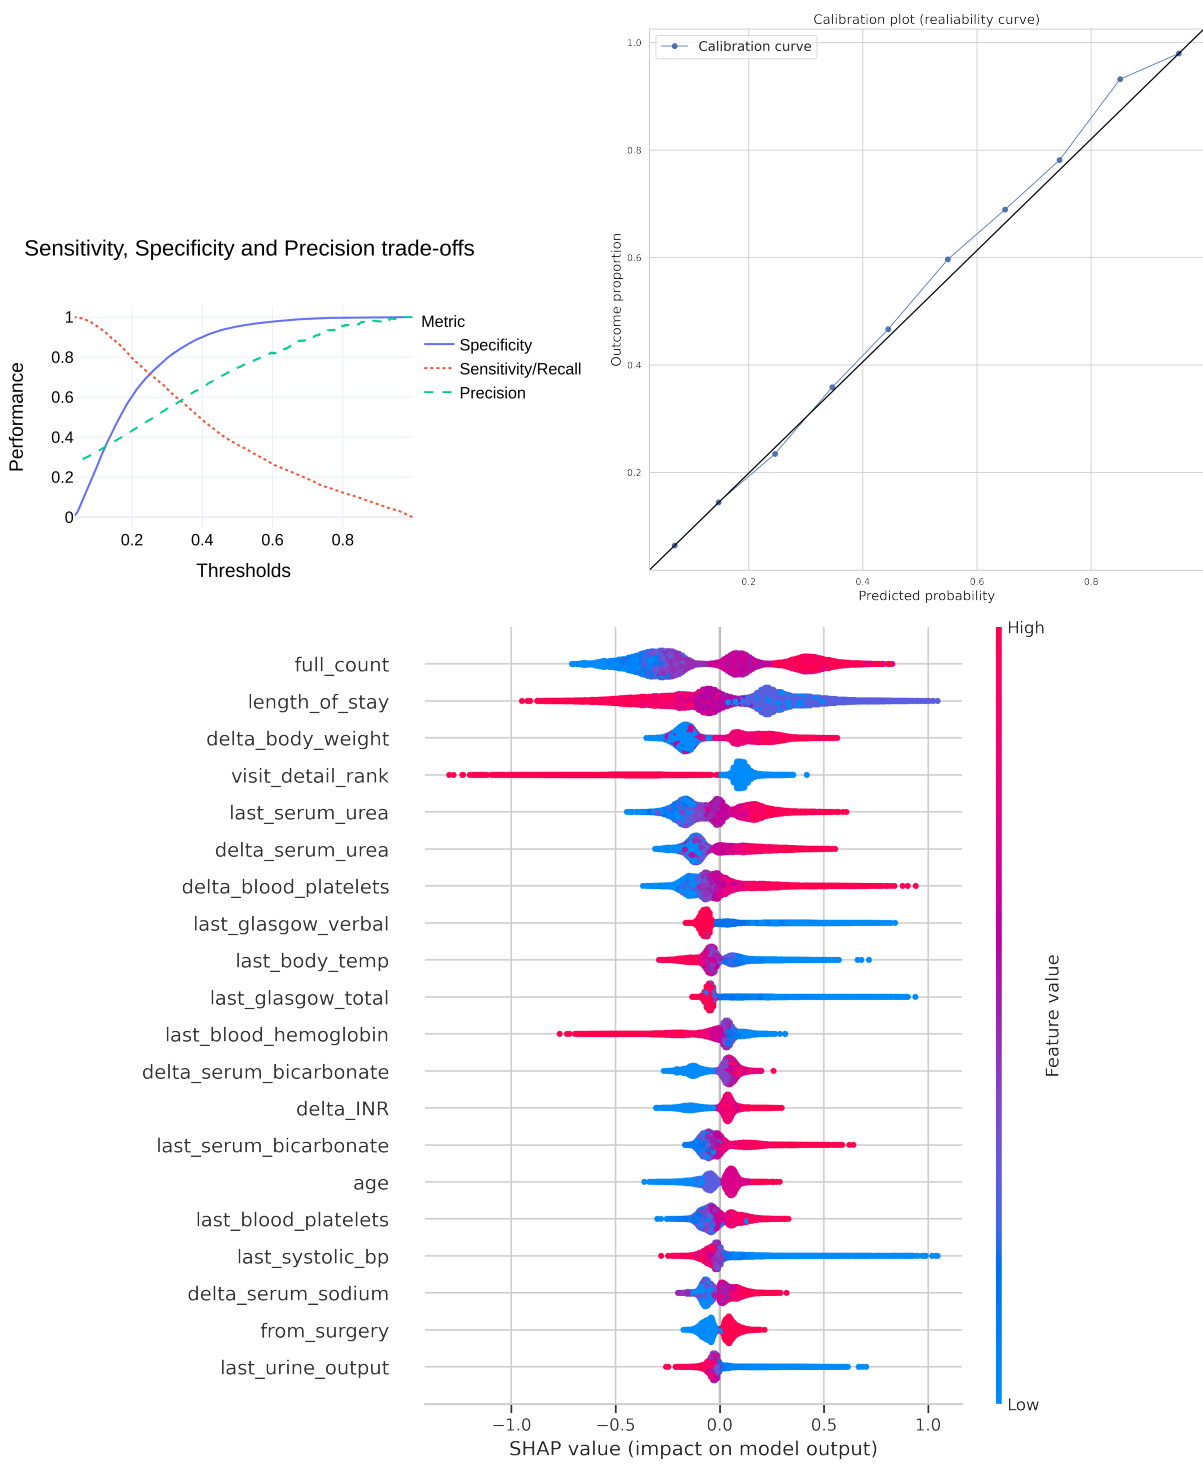

**Fig. 5.** Performance trade-offs, calibration plot and features importance plot for 30-days readmission prediction
